# Supplementary material for: Lipid catabolism inhibition sensitizes prostate cancer cells to antiandrogen blockade
Source: PubMed Central journal article supplement (PMC5593544; doi:10.18632/oncotarget.17359), 2017-04-21
Supplement: oncotarget-08-56051-s001.pdf [file oncotarget-08-56051-s001.pdf]

# Lipid catabolism inhibition sensitizes prostate cancer cells to antiandrogen blockade

## SUPPLEMENTARY MATERIALS

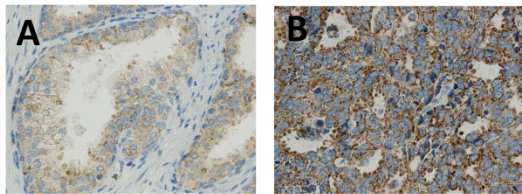

40X images of CPT1A stain in the luminal cells of prostate gland

Data from c-BioPortal

| STUDY ABBREVIATION               | STUDY NAME                                                                   | NUM OF CASES ALTERED | PERCENT CASES ALTERED |
|----------------------------------|------------------------------------------------------------------------------|----------------------|-----------------------|
| NEPC (Trento/Cornell/Broad 2016) | Neuroendocrine Prostate Cancer (Beltran et al., Nat med 2016)                | 25                   | 23.40%                |
| Prostate (SU2C)                  | Metastatic Prostate Cancer, SU2C/PCF Dream Team (Robinson et al., Cell 2015) | 16                   | 10.70%                |
| Prostate (MICH)                  | Prostate Adenocarcinoma, Metastatic (Michigan, Nature 2012)                  | 3                    | 4.90%                 |
| Prostate (TCGA)                  | Prostate Adenocarcinoma (TCGA, Provisional)                                  | 7                    | 2.10%                 |
| Prostate (TCGA 2015)             | Prostate Adenocarcinoma (TCGA, Cell 2015)                                    | 7                    | 2.10%                 |
| Prostate (Broad/Cornell 2012)    | Prostate Adenocarcinoma (Broad/Cornell, Nat Genet 2012)                      | 2                    | 1.80%                 |

**Supplementary Figure 1:** Additional images of CPT1a stains at 40X. A) Benign gland. B) Prostate cancer, Gleason pattern 5. Table to the right shows additional information from c-BioPortal on CPT1A gene alterations.

## Cloning data for CRISPR editing

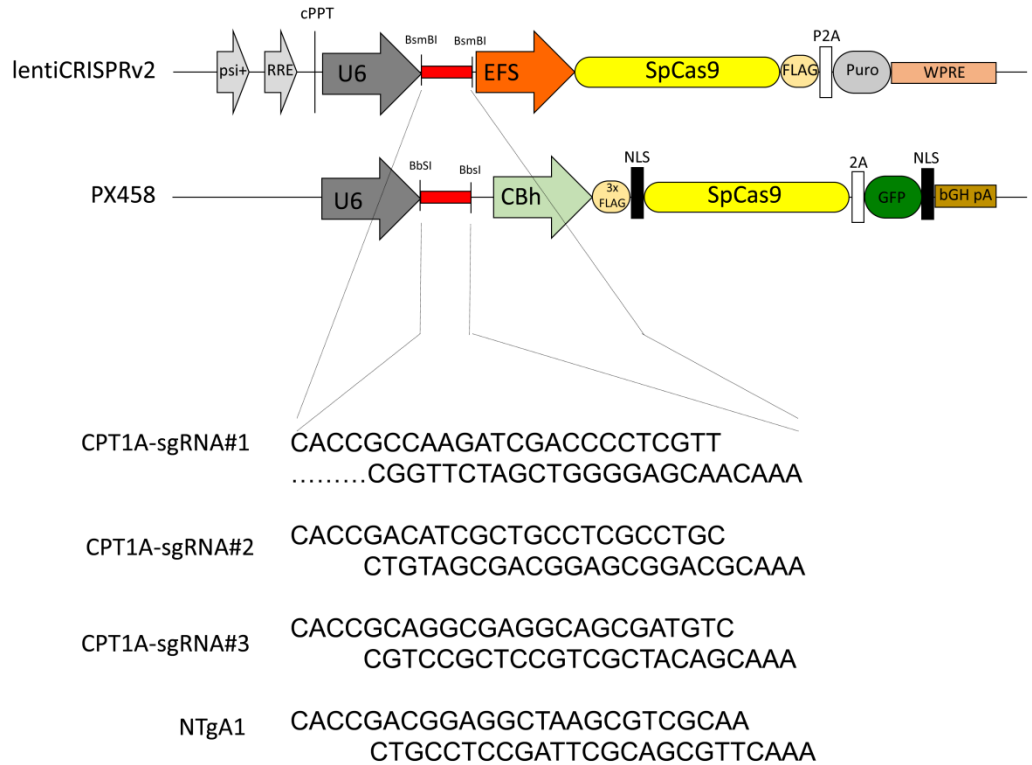

**Supplementary Figure 2:** Schematic of the CRISPR design to edit CPT1A gene in LNCaP cells. The Functional Genomics Facility at University of Colorado, designed the CRISPR/Cas9 clones. Two different gRNA targeting CPT1A were chosen in combination to produce the most effective knock out: 1) GCCAAGATCGACCCCTCGTT, and 3) GCAGGCGAGGCAGCGATGTC, which were cloned into lentiCRISPRv2 vector (gift from Dr. Feng Zhang lab at the Broad Institute, MIT). One non-targeting control gRNA GACGGAGGCTAAGCGTCGCAA was used for control. Although we designed 2 constructs; the one that uses puromycin as a selection agent (Top) produced the best results and was used in the studies.

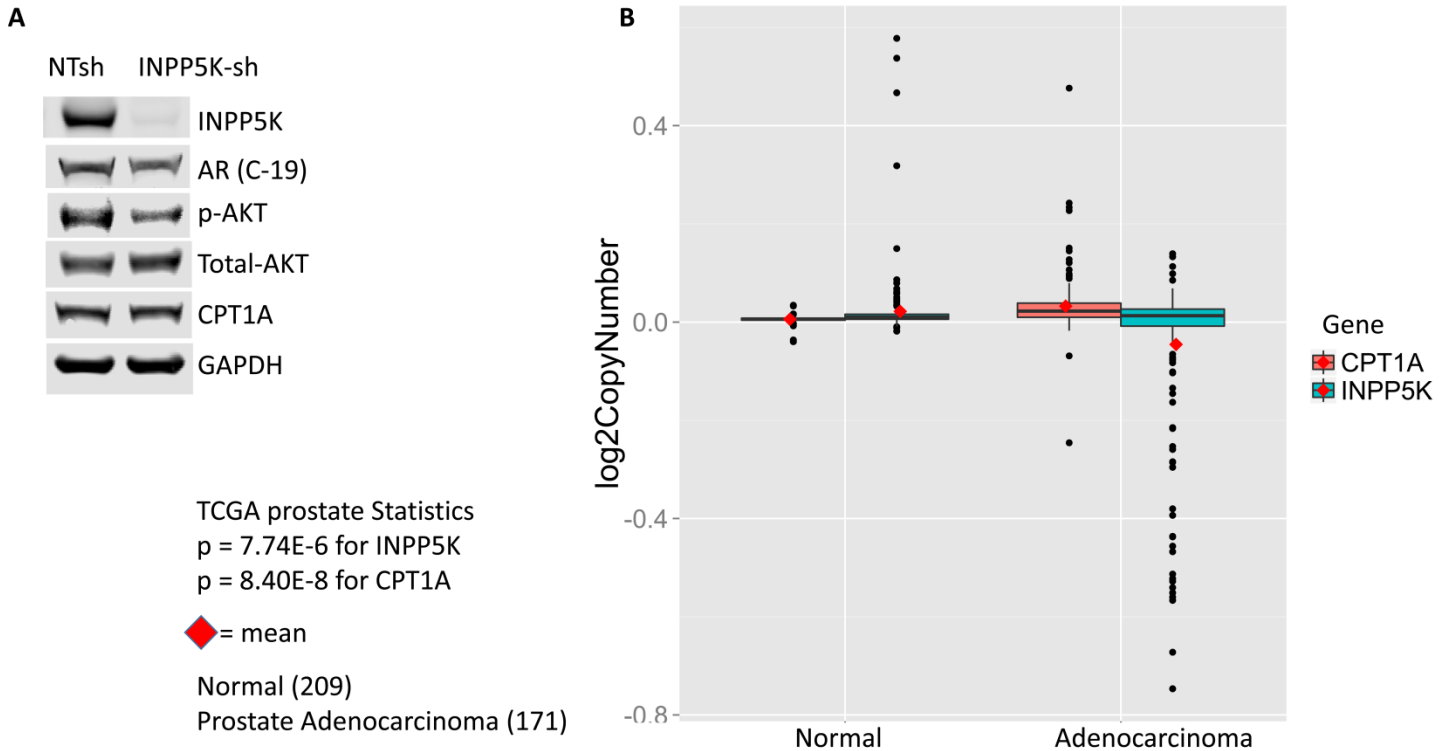

**Supplementary Figure 3:** **A)** Western blots of LNCaP cell lysates transfected with NT (non-targeting) or INPP5K-shRNA (TRCN0000052707) viral particles. **B)** Gene copy number analysis of CPT1A and INPP5K in TCGA prostate data from Oncomine™ website. Data was downloaded for both genes and plotted as Log<sub>2</sub> of the copy number. Line in the boxes represents the median. The red diamond represents the mean for each group.

**Supplementary Table 1: CPT1A expression in selected studies from Oncomine™ database.**

| <b>CPT1A expression from Oncomine</b>         |                 |                      |                                   |                  |
|-----------------------------------------------|-----------------|----------------------|-----------------------------------|------------------|
| <b>Study data set</b>                         | <b>size (N)</b> | <b>p-value</b>       | <b>Fold change or correlation</b> | <b>Reference</b> |
| <b>1- Metastasis (Primary vs. Metastasis)</b> |                 |                      |                                   |                  |
| Liu (Copy number)                             | 58              | 0.01                 | 1.14                              | [1]              |
| Grasso (mRNA)                                 | 122             | $2.9 \times 10^{-6}$ | 2.62                              | [2]              |
| Chandran (mRNA)                               | 31              | $5.9 \times 10^{-5}$ | 2.65                              | [3]              |
| Varambally (mRNA)                             | 19              | 0.025                | 1.43                              | [4]              |
| <b>2- Cancer vs. Normal</b>                   |                 |                      |                                   |                  |
| TCGA Copy number                              | 380             | $8.4 \times 10^{-8}$ | 1.02                              | TCGA prostate    |
| Vanaja (mRNA)                                 | 40              | $5.8 \times 10^{-4}$ | 1.09                              | [5]              |
| <b>3- Clinical Outcome (dead at 5 years)</b>  |                 |                      |                                   |                  |
| Setlur (mRNA)                                 | 363             | $1.4 \times 10^{-6}$ | 1.12                              | [6]              |
| <b>4- Advanced Gleason Score</b>              |                 |                      |                                   |                  |
| Luo (mRNA) (6 vs 7)                           | 13              | $1.5 \times 10^{-4}$ | 1.96                              | [7]              |
| Setlur (mRNA)                                 | 363             | $4.2 \times 10^{-7}$ | r = 0.25                          | [6]              |
| Glinsky (mRNA)                                | 79              | 0.001                | r = 0.35                          | [8]              |
| Lapointe (mRNA)                               | 58              | 0.037                | r = 0.24                          | [9]              |

| <b>Supplementary Table 2: Primers</b> |                                  |               |
|---------------------------------------|----------------------------------|---------------|
| <b>name</b>                           | <b>sequence</b>                  | <b>length</b> |
| AR (all forms)-F                      | GAAAGCGACTTCACCGCAC              | 20            |
| AR (all forms)-R                      | AAAACATGGTCCCTGGCAGT             | 21            |
| ARfl-F                                | ACATCAAGGAACTCGATCGTATCATTGC     | 28            |
| ARfl-R                                | TTGGGCACTTGACACAGAGAT            | 20            |
| ARv7-F                                | CCATCTTGTCGTCTTCGGAAATGTTATGAAGC | 32            |
| ARv7-R                                | TTTGAATGAGGCAAGTCAGCCTTTCT       | 26            |
| PSA-F                                 | CGGATGCTGTGAAGGTCATGGAC          | 23            |
| PSA-R                                 | GGGTCAAGAACTCCTCTGGTTC           | 21            |
| RPL13A-F                              | CCTGGAGGAGAAGAGGAAAGAGA          | 23            |
| RPL13A_R                              | TTGAGGACCTCTGTGTATTTGTCAA        | 25            |

Primers for CPT1A, CLU, ACPP, ETV1, INPP5K, and AZGP1 were purchased from Sigma Aldrich as pre-designed KiCqStart® SYBR® Green Primers.

| <b>Supplementary Table 3: Antibodies</b> |                         |                |
|------------------------------------------|-------------------------|----------------|
| <b>Antibody</b>                          | <b>Catalogue number</b> | <b>Company</b> |
| pAKT                                     | 4051                    | Cell Signaling |
| AKT                                      | 9272                    | Cell Signaling |
| GAPDH                                    | 5174                    | Cell Signaling |
| CPT-1A                                   | 15184-1-AP              | Proteintech    |
| INPP5K                                   | 15098-1-AP              | Proteintech    |
| AR (C19)                                 | SC-815                  | Santa Cruz     |
| AR (N20)                                 | SC-816                  | Santa Cruz     |
| AR-v7                                    | AG10008                 | Precision      |
| Goat-anti Mouse-HRP                      | SC-2064                 | Santa Cruz     |
| Goat-anti Rabbit-HRP                     | SC-2030                 | Santa Cruz     |

**Supplementary Table 4:** Excel file with all the common genes significantly changed (red=increase/blue=decreased) in the CPT1AKD clones. KEGG pathway analysis and String Network also included.

For Supplementary Table 4 see in Supplementary Files.

## References

1. Liu W, Laitinen S, Khan S, Vihinen M, Kowalski J, Yu G, Chen L, Ewing CM, Eisenberger MA, Carducci MA, Nelson WG, Yegnasubramanian S, Luo J, et al. Copy number analysis indicates monoclonal origin of lethal metastatic prostate cancer. *Nat Med.* 2009; 15: 559-65.
2. Grasso CS, Wu YM, Robinson DR, Cao X, Dhanasekaran SM, Khan AP, Quist MJ, Jing X, Lonigro RJ, Brenner JC, Asangani IA, Ateeq B, Chun SY, et al. The mutational landscape of lethal castration-resistant prostate cancer. *Nature.* 2012; 487: 239-43.
3. Chandran UR, Ma C, Dhir R, Bisceglia M, Lyons-Weiler M, Liang W, Michalopoulos G, Becich M, Monzon FA. Gene expression profiles of prostate cancer reveal involvement of multiple molecular pathways in the metastatic process. *BMC Cancer.* 2007; 7: 64.
4. Varambally S, Yu J, Laxman B, Rhodes DR, Mehra R, Tomlins SA, Shah RB, Chandran U, Monzon FA, Becich MJ, Wei JT, Pienta KJ, Ghosh D, et al. Integrative genomic and proteomic analysis of prostate cancer reveals signatures of metastatic progression. *Cancer Cell.* 2005; 8: 393-406.
5. Vanaja DK, Chevillat JC, Iturria SJ, Young CY. Transcriptional silencing of zinc finger protein 185 identified by expression profiling is associated with prostate cancer progression. *Cancer Res.* 2003; 63: 3877-82.
6. Setlur SR, Mertz KD, Hoshida Y, Demichelis F, Lupien M, Perner S, Sboner A, Pawitan Y, Andren O, Johnson LA, Tang J, Adami HO, Calza S, et al. Estrogen-dependent signaling in a molecularly distinct subclass of aggressive prostate cancer. *J Natl Cancer Inst.* 2008; 100: 815-25.
7. Luo JH, Yu YP, Cieply K, Lin F, Deflavia P, Dhir R, Finkelstein S, Michalopoulos G, Becich M. Gene expression analysis of prostate cancers. *Mol Carcinog.* 2002; 33: 25-35.

8. Glinsky GV, Glinskii AB, Stephenson AJ, Hoffman RM, Gerald WL. Gene expression profiling predicts clinical outcome of prostate cancer. *J Clin Invest.* 2004; 113: 913-23.
9. Lapointe J, Li C, Higgins JP, van de Rijn M, Bair E, Montgomery K, Ferrari M, Egevad L, Rayford W, Bergerheim U, Ekman P, DeMarzo AM, Tibshirani R, et al. Gene expression profiling identifies clinically relevant subtypes of prostate cancer. *Proc Natl Acad Sci U S A.* 2004; 101: 811-6.
